# Supplementary material for: Reliability of the velocity achieved during the last repetition of sets to failure and its association with the velocity of the 1-repetition maximum
Source: PeerJ. 2020 Mar 11;8:e8760. doi: 10.7717/peerj.8760 (PMC7071817; doi:10.7717/peerj.8760)
Supplement: Supplemental Information 1 — CONC-concentric-only bench press; 1RM-one repetition maximum; Reps-number of repetition; CEA-stretch shortening cycle; Aver- average. [file peerj-08-8760-s001.xlsm]

## Sheet: Vlast
CODE	Conc_1RM	CEA_1RM	Conc_1RM	CEA_1RM	CONC_Reps_1	CONC_Reps_2	CEA_Reps_1	CEA_Reps_2	CONC_1	CONC_2	CEA_1	CEA_2	CONC_Aver	CEA_Aver
1	85	90	0.0933309	0.141925	6	5	4	4	0.158421	0.136115	0.121423	0.142045	0.147268	0.131734
2	82.5	85	0.133337	0.214707	5	4	5	5	0.12265	0.122511	0.20241	0.184498	0.122581	0.193454
5	77.5	82.5	0.136395	0.120702	9	6	10	7	0.0918956	0.10148	0.0856521	0.0920856	0.0966878	0.0888689
6	52.5	52.5	0.148506	0.166186	6	5	9	4	0.168363	0.125405	0.13471	0.123335	0.146884	0.129022
7	65		0.197755		7	6			0.224485	0.219842			0.222164
8	57.5	62.5	0.174511	0.15	5	4	7	4	0.193536	0.18165	0.231699	0.222911	0.187593	0.227305
9	72.5	85	0.225348	0.116733	6	5	8	6	0.148318	0.145875	0.112617	0.0886574	0.147096	0.100637
10	47.5	50	0.177404	0.266266	4	3	3	2	0.204896	0.203948	0.205313	0.250454	0.204422	0.227884
12	60	65	0.252012	0.157446	4	3	4	3	0.219129	0.179578	0.124675	0.129465	0.199353	0.12707
13	35	40	0.234082	0.242394	7	8	7	6	0.193256	0.200385	0.10711	0.208591	0.19682	0.15785
14	65	70	0.271986	0.12706	6	5	8	8	0.197115	0.164701	0.150439	0.160201	0.180908	0.15532
17	100	97.5	0.16598	0.154018	8	6	15	10	0.124082	0.137601	0.120361	0.102066	0.130842	0.111214
18	80	75	0.326258	0.232993	7	5	9	8	0.209295	0.120259	0.198609	0.148279	0.164777	0.173444
19	55	57.5	0.198763	0.214417	6	5	5	3	0.164374	0.21392	0.229521	0.256882	0.189147	0.243201
20	67.5	70	0.0952213	0.17002	7	6	8	5	0.154763	0.104125	0.0829086	0.0874882	0.129444	0.0851984
22	42.5	47.5	0.192484	0.149532	10	9	4	5	0.130816	0.0679972	0.188902	0.16307	0.0994066	0.175986
23	62.5	67.5	0.175552	0.230059	5	3	8	8	0.162025	0.255293	0.294361	0.159776	0.208659	0.227068
24	92.5	95	0.101614	0.146947	5	5	8	7	0.137638	0.138594	0.12984	0.103391	0.138116	0.116615
27	51	52.5	0.204092	0.210766	9	6	8	7	0.192767	0.20677	0.194979	0.167356	0.199769	0.181168
28	65	70	0.169499	0.169469	5	4	6	4	0.149424	0.161232	0.121019	0.153729	0.155328	0.137374
29	65	65	0.131102	0.195194	6	5	5	5	0.146189	0.163249	0.243767	0.163474	0.154719	0.20362
30	55	57.5	0.174391	0.187984	7	6	4	3	0.10665	0.135401	0.20298	0.176695	0.121026	0.189837
32	46	50	0.0778563	0.159706	5	6	10	5	0.15733	0.158481	0.118471	0.13842	0.157905	0.128445
34	42.5	55	0.193312	0.231049	7	5	2	6	0.154732	0.0888836	0.154892	0.225998	0.121808	0.190445
36	62.5	67.5	0.171562	0.19056	5	5	3	2	0.089	0.164042	0.162146	0.177561	0.126521	0.169853
37	55	55	0.158407	0.181437	7	8	9	7	0.126054	0.0910974	0.151953	0.10934	0.108576	0.130647
39	38.5	40	0.177793	0.190387	11	9	7	6	0.13672	0.166999	0.144999	0.136553	0.151859	0.140776
40	53.5	55	0.106586	0.236052	5	5	7	4	0.224549	0.188638	0.156703	0.200613	0.206594	0.178658
41	60	65	0.166289	0.170477	5	6	5	3	0.211494	0.272574	0.271528	0.152073	0.242034	0.211801
42	57.5	60	0.123878	0.180017	9	6	10	7	0.121033	0.142834	0.221968	0.103787	0.131933	0.162878
43	50	56	0.238616	0.159263	8	4	4	1	0.174532	0.203887	0.202531	0.246403	0.189209	0.224467
45	66	60	0.10674	0.192423	7	3	3	2	0.0635343	0.142855	0.176425	0.13262	0.103194	0.154523
49	57.5	60	0.25249	0.101951	6	4	11	3	0.187011	0.231901	0.134622	0.234562	0.209456	0.184592
50	50	52.5	0.211448	0.182504	6	4	5	4	0.151239	0.139693	0.154167	0.186062	0.145466	0.170114
52	40	45	0.0912366	0.220866	9	6	8	5	0.132745	0.125206	0.168022	0.101637	0.128975	0.13483
54	55	60	0.19615	0.106032	6	4	3	4	0.0921986	0.130618	0.0886087	0.182945	0.111408	0.135777
55	42.5	46	0.182748	0.12098	6	4	7	8	0.138247	0.0903177	0.14783	0.156386	0.114283	0.152108
56	42.5	47.5	0.218818	0.228298	8	5	3	2	0.153353	0.147277	0.185167	0.199032	0.150315	0.192099
57	67.5	75	0.132448	0.122011	9	2	8	6	0.111576	0.116976	0.114684	0.1024	0.114276	0.108542
58	43.5	50	0.283213	0.134888	10	6	7	5	0.192239	0.198085	0.228399	0.186098	0.195162	0.207248
60	52.5	53.5	0.233325	0.205625	3	6	6	5	0.177616	0.145932	0.147692	0.0982592	0.161774	0.122975
61	62.5	67.5	0.186001	0.139328	10	10	9	5	0.164907	0.0985131	0.1594	0.15537	0.13171	0.157385
62	60	66	0.16543	0.0616211	6	5	5	4	0.101356	0.112798	0.163876	0.163575	0.107077	0.163725
63	40	45	0.265641	0.141655	7		3	3	0.199823		0.163357	0.120076	0.199823	0.141717
64	53.5	57.5	0.199732	0.125729	5	6	9	6	0.169802	0.11849	0.137326	0.119658	0.144146	0.128492
65	50	57.5	0.233087	0.264153	9	6	11	8	0.157619	0.204187	0.190925	0.153137	0.180903	0.172031
66	55		0.219412		7	5			0.12392	0.124889			0.124405
68	51	55	0.216709	0.185158	5	4	7	5	0.138536	0.170744	0.238308	0.156483	0.15464	0.197396
69	41	45	0.110917	0.193109	6	6	5	7	0.17425	0.137028	0.189775	0.164626	0.155639	0.1772
70	50	56	0.176086	0.112791	6	4	7	6	0.141376	0.101346	0.110218	0.0978634	0.121361	0.104041
71	40	47.5	0.190275	0.187608	10	12	11	11	0.246293	0.192692	0.16677	0.137506	0.219492	0.152138
72	67.5	70	0.1451	0.0905671	9	5	9	7	0.145692	0.113879	0.0847433	0.108988	0.129786	0.0968655
73	58.5	63.5	0.127017	0.166805	6		6	7	0.150773		0.14587	0.135844	0.150773	0.140857
74	77.5	92.5	0.172	0.083	7	5	11	7	0.167	0.116	0.15	0.122	0.1415	0.136
75		96		0.096			8	6			0.15	0.163		0.1565
76	92.5	100	0.130183	0.0881989	13	11	10	9	0.109849	0.19254	0.179251	0.163177	0.151194	0.171214
80	56	60	0.158652	0.163086	7	6	9	7	0.187912	0.190885	0.14381	0.109134	0.189399	0.126472
81	52.5	56	0.21187	0.157539	10	8	6	6	0.152773	0.117957	0.14445	0.137471	0.135365	0.14096
82	41	47.5	0.192716	0.164839	7	6	7	6	0.220639	0.138216	0.110634	0.112835	0.179428	0.111735
83	52.5		0.187112		6	6			0.226609	0.134305			0.180457
86	48.5	55	0.149591	0.163282	5	3	4	4	0.220965	0.208949	0.265594	0.219552	0.214957	0.242573
87	42.5	47.5	0.221967	0.223538	6	5	4	2	0.191594	0.161811	0.13786	0.134495	0.176702	0.136177
89	98	105	0.193035	0.174542	6	5	12	10	0.170144	0.167776	0.18242	0.216173	0.16896	0.199297
90		72.5		0.181777			6	5			0.0935218	0.131255		0.112388
91	50	57.5	0.220532	0.217487	5	5	4	3	0.185627	0.171151	0.147758	0.133954	0.178389	0.140856
92	47.5	50	0.14	0.289392	10	8	7	4	0.11278	0.156689	0.252426	0.256352	0.134734	0.254389
93	66	80	0.105455	0.242929	7	4	5	4	0.251872	0.227448	0.165101	0.153379	0.23966	0.15924
94	60	67.5	0.191698	0.13973	9	8	7	7	0.104222	0.0861652	0.164753	0.135385	0.0951935	0.150069
95	55	55	0.233	0.218843	4	4	5	3	0.231	0.209	0.159657	0.163567	0.22	0.161612
98	55	57.5	0.189	0.162274	8	8	6	5	0.154	0.119	0.0882893	0.11814	0.1365	0.103215
100	72.5		0.132		3	5			0.177	0.121			0.149
101	95	105	0.175	0.180088	8	6	8	8	0.133	0.147	0.1443	0.0954969	0.14	0.119898
104	72.5	85	0.107687	0.334065	12	9	10	6	0.101668	0.129694	0.0732999	0.153995	0.115681	0.113647
105	95	95	0.129468	0.139969	5	7	5	5	0.159448	0.132668	0.159448	0.194523	0.146058	0.176986
106	46	52.5	0.144086	0.176305	9	4	9	9	0.131177	0.200729	0.117809	0.123589	0.165953	0.120699
107	60	67.5	0.238831	0.206666	7	6	7	6	0.202862	0.179514	0.175153	0.189374	0.191188	0.182264
108	75.5	85	0.155804	0.158605	3	3	7	6	0.280535	0.224882	0.194888	0.145164	0.252708	0.170026
109	81		0.138866		8	7			0.121914	0.145673			0.133793
110	45	50	0.237582	0.116474	6	5	7	5	0.176384	0.0930629	0.1673	0.159636	0.134724	0.163468
111	52.5	52.5	0.18537	0.29087	4	4	4	6	0.183438	0.251735	0.232571	0.124379	0.217586	0.178475
112	95	97.5	0.106565	0.093334	5	4	7	6	0.138925	0.200264	0.122231	0.187715	0.169595	0.154973
113	70	73.5	0.14175	0.1548	7	6	8	6	0.159218	0.137074	0.136127	0.182496	0.148146	0.159312
114	77.5	85	0.129546	0.147418	5	3	10	8	0.161274	0.203522	0.147296	0.197132	0.182398	0.172214
115	87.5	97.5	0.16834	0.111013	6	6	8	7	0.083385	0.107911	0.1251	0.122833	0.0956479	0.123966
116	57.5	60	0.12525	0.209709	5	5	11	4	0.274699	0.225212	0.209701	0.180094	0.249955	0.194897
117	102.5		0.0729487		7	5			0.186094	0.191389			0.188741
118	60	60	0.223107	0.156308	3	4	7	5	0.223014	0.185242	0.205014	0.157981	0.204128	0.181498
119	67.5		0.218338		10	10			0.153788	0.124963			0.139375
120	55	57.5	0.140533	0.275564	6	4	5	7	0.23182	0.256746	0.217672	0.261486	0.244283	0.239579
121	130	140	0.140732	0.288735	5	5	9	9	0.115006	0.112	0.148033	0.191589	0.113503	0.169811
122	82.5	95	0.202851	0.126863	6	7	5	5	0.098067	0.131585	0.111703	0.129993	0.114826	0.120848
123	65	70	0.174183	0.262435	5	5	4	3	0.154224	0.17289	0.188046	0.237355	0.163557	0.2127
124	52.5	57.5	0.149503	0.101569	5	6	5	5	0.157945	0.13007	0.171021	0.174276	0.144007	0.172649
125	67.5	75	0.116999	0.14726	9	8	5	4	0.120094	0.126757	0.122993	0.130976	0.123425	0.126984
131	85	90	0.173853	0.137789	4	4	4	5	0.0834143	0.111728	0.182845	0.108302	0.0975713	0.145574
132		50		0.250158			6	4			0.129417	0.110752		0.120084
